# Supplementary material for: Protein Delivery of an Artificial Transcription Factor Restores Widespread Ube3a Expression in an Angelman Syndrome Mouse Brain
Source: PubMed Central journal article supplement (PMC4786922; doi:10.1038/mt.2015.236), 2016-02-02
Supplement: mt2015236x1.pdf [file mt2015236x1.pdf]

# SUPPLEMENTARY MATERIALS

## Protein Delivery of Artificial Transcription Factor Restores Widespread Ube3a Expression in an Angelman Syndrome Mouse Brain

Barbara J. Bailus<sup>1</sup>, Benjamin Pyles<sup>1</sup>, Michelle M. McAlister<sup>1</sup>, Henriette O'Geen<sup>1</sup>, Sarah H. Lockwood<sup>1</sup>, Alexa N. Adams<sup>1</sup>, Jennifer T. Trang Nguyen<sup>1</sup>, Abigail Yu, Robert F. Berman<sup>2</sup>, and David J. Segal<sup>1\*</sup>

<sup>1</sup>Genome Center, MIND Institute, and Department of Biochemistry and Molecular Medicine, University of California, Davis, CA 95616, USA

<sup>2</sup>Department of Neurological Surgery, University of California, Davis, CA 95616, USA

\* To whom correspondence should be addressed:  
djsegal@ucdavis.edu

### TABLE OF CONTENTS

|                                                                                                          |     |
|----------------------------------------------------------------------------------------------------------|-----|
| Figure S1: Sequence of proteins and reporters used in this study.....                                    | 2-4 |
| Figure S2: TAT-ATFs protein purification.....                                                            | 5   |
| Figure S3: High-resolution images of Ube3a activation by TAT-S1 but not TAT-R6.....                      | 6   |
| Table S1: DNA binding sequence and recognition helices of the zinc finger arrays used in this study..... | 7   |
| Table S2: Primers used in this study.....                                                                | 8   |

**Figure S1: Sequence of proteins and reporters used in this study.**

**A) Sequence of the TAT-S1 ATF (922 aa)**

Maltose binding protein-TAT-mCherry-HA-tag-SV40-NLS-Zinc fingers (recognition helices F1 -> F6 underlined)-KRAB-A box

Protein

MKIEEGKLVIIWINGDKGYNGLAEVGGKFEKDTGIKVTVEHPDKLEEKFPQVAATGDGPDIIFW  
AHDRFGGYAQSGLLAEITPDKAFQDKLYPFTWDAVRYNGKLIAYPIAVEALS LIYNKDLLPNP  
PKTWEEIIPALDKELKAKGKSALMFNLQEPYFTWPLIAADGGYAFKYENGGYDIKDVGVNDAGA  
KAGLTFVLVDLIKNKHMNADTDYSIAEAAFNKGETAMTINGPWAWSNIDTSKVNYGVTVLP  
TFK GQPSKPFVGVLSAGINAASPNKELAKEFLENYLLTDEGLEAVNKDKPLGAVALKS  
YEEELAKD PRIAATMENAOKGEIMPNI PQMSAFWYAVRTAVINAASGRQTVDEALKDAQ  
TNSSSNNNNNNN NNNLGI EGR ISEFGSGAP GRKKRRQRRR VDMVSKGEEDNMAI  
I KEFMRFKVHMEG SVNGHEFE IE GEGEGRPYEGTQTAKLKVTKGGPLP  
FAWDILSPQFMYGSKAYVKHPADIPDYLKLSFPEGF KWERMNFEDGGVVTVTQD  
SSLQDGEFIYKVKLRGTNFPDGPVMQKKTMGWEASSERMYPED GALKGEIKQRLK  
LKDGGHYDAEVKTTYKAKKPVQLPGAYNVNIKLDITSHNEDYTI VEQYERA  
EGRHSTGGMDELKSRYPYDVPDYANSPGIPGMGPKKKRKGVRLEPGEKPYMCAECGK  
SFSRS **DDLVRHQ**RTHTTGEKPYKCPECGKSFSDCRDLARHQ**RTHTTGEKPYKCPECGKSF**  
**SORAHLE**RHQ **RTHTTGEKPYKCPECGKSF**SREDNL**HTHQ**RTHTTGEKPYKCPECGKSF  
SRS**DDLVRHQ**RTHTTGEKPYKCPECGKSF**STSGNLTEHQ**RTHTT**AAAATL**VTFKDV  
FVDF**TRE**EWKLLDTAQQIVYRNVMLE KYKNLVSLGYQLTKPDVILRLEKGE  
EPWLVEREIHQETHP\*

DNA

ATGAAAATCGAAGAAGGTAAACTGGTAATCTGGATTAACGGCGATAAAGGCTATAACGGTCTCGCTGAAG  
TCGGTAAGAAATTCGAGAAAGATACCGGAATTAAGTCAACCGTTGAGCATCCGGATAAAGTGGAAAGAGAA  
ATTCCCACAGGTTGCGGCAACTGGCGATGGCCCTGACATTATCTTCTGGGCACACGACCGCTTTGGTGGC  
TACGCTCAATCTGGCCTGTTGGCTGAAATCACCCCGGACAAAGCGTTCCAGGACAAGCTGTATCCGTTTA  
CCTGGGATGCCGTACGTTACAACGGCAAGCTGATTGCTTACCCGATCGCTGTTGAAGCGTTATCGCTGAT  
TTATAACAAAGATCTGCTGCCGAACCCGCCAAAAACCTGGGAAGAGATCCCGGCGCTGGATAAAGAAGCTG  
AAAGCGAAAGGTAAGAGCGCGCTGATGTTCAACCTGCAAGAACCCTACTTACCTGGCCGCTGATTGCTG  
CTGACGGGGGTTATGCGTTCAAGTATGAAAACGGCAAGTACGACATTAAGACGTTGGGCGTGGATAACGC  
TGGCGCGAAAGCGGGTCTGACCTTCTGGTTGACCTGATTAATAAACAACACATGAATGCAGACACCGAT  
TACTCCATCGCAGAAGCTGCCTTTAATAAAGGCGAAACAGCGATGACCATCAACGGCCCGTGGGCATGGT  
CCAACATCGACACCAGCAAAGTGAATTAAGGTGTAACGGTACTGCCGACCTTCAAGGGTCAACCATCCAA  
ACCGTTCGTTGGCGTGCTGAGCGCAGGTATTAACGCCCGCAGTCCGAACAAAGAGCTGGCAAAAGAGTTC  
CTCGAAAATCTATCTGCTGACTGATGAAGGTCTGGAAAGCGGTTAATAAAGACAAACCGCTGGGTGCCGTAG  
CGCTGAAGTCTTACGAGGAAGAGTTGGCGAAAGATCCACGTATTGCCGCCACCATGGAAAACGCCAGAA  
AGGTGAAATCATGCCGAACATCCCGCAGATGTCCGCTTCTGGTATGCCGTGCGTACTGCGGTGATCAAC  
GCCGCCAGCGGTGCTCAGACTGTTCGATGAAGCCCTGAAAGACGCGCAGACTAATTCGAGCTCGAACAACA  
ACAACAATAACAATAACAACAACCTCGGGATCGAGGGAAGGATTCAGAATTCGGATCTGGCGCGCCAGG  
CCGTAAAAACGTCGTCAGCGCCGTCGCGTTCGACATGGTGAGCAAGGGCGAGGAGGATAACATGGCCATC  
ATCAAGGAGTTCATGCGCTTCAAGGTGCACATGGAGGGCTCCGTGAACGGCCACGAGTTCGAGATCGAGG  
GCGAGGGCGAGGGCCGCCCTACGAGGGCACCCAGACCGCCAAGCTGAAGGTGACCAAGGGTGGCCCCCT  
GCCCTTCGCTGGGACATCCTGTCCCCTCAGTTCATGTACGGCTCCAAGGCCTACGTGAAGCACCCGCC  
GACATCCCCGACTACTTGAAGCTGTCTTCCCCGAGGGCTTCAAGTGGGAGCGCGTATGAAGTTCGAGG  
ACGGCGCGTGGTGACCGTGACCCAGGACTCCTCCCTGCAGGACGCGGAGTTCATCTACAAGGTGAAGCT  
GCGCGCACCAACTTCCCCTCCGACGGCCCCGTAATGCAGAAGAAGACCATGGGCTGGGAGGCCCTCCTCC  
GAGCGGATGTACCCCGAGGACGGCGCCCTGAAGGGCGAGATCAAGCAGAGGCTGAAGCTGAAGGACGGCG  
GCCACTACGACGCTGAGGTCAAGACCACCTACAAGGCCAAGAAGCCCGTGCAGCTGCCCGGCGCCTACAA

CGTCAACATCAAGTTGGACATCACCTCCCACAACGAGGACTACACCATCGTGGAACAGTACGAACGCGCC  
GAGGGCCGCCACTCCACCGGCGGCATGGACGAGCTGTACAAGTCTAGATACCCATACGATGTCCAGACT  
ACCGGAATTCCCCGGGGATCCCAGGCATGGGGCCCAAAAAGAAACGCAAAGTTGGGCGCCTCGAGCCCGG  
GGAGAAACCATATAAGTGTCCAGAGTGTGGTAAATCCTTTAGCAGAAGCGATGATCTGGTGAGACATCAA  
AGAACACACACCGGAGAAAAGCCTTACAAGTGTCTGAGTGGGTAAGAGCTTTTCTGATTGTAGAGACC  
TTGCGCGCCATCAGCGGACTCACACAGGCGAGAAGCCTTATAAATGCCCTGAGTGTGGCAAATCTTTCTC  
TCAGAGAGCACATCTGGAGCGACATCAGAGGACGCACACTGGGGAGAAACCCTATAAGTGCCCTGAATGC  
GGAAAAAGTTTTAGTCGGGAAGATAACTTGCATACACACCAGAGGACACATACGGGCGAAAAGCCCTACA  
AATGTCCGGAATGCGGGAAGTCCTTCTCTCGGTGAGTACCTCGTTAGGCACCAGAGAACACATACCGG  
CGAAAACCTTACAAATGCCAGAAATGTGGGAAGAGCTTACGACTTCCGGCAATCTTACCGAGACCAA  
AGAACCACACCGGTGCGGCCGCCACACTGGTGACCTTCAAGGATGATTTTGTGGACTTACCAGGGAGG  
AGTGGAAAGCTGCTGGACTGCTCAGCAGATCGTGTACAGAAATGTGATGCTGGAGAAATATAAGAACCT  
GGTTTCTTGGGTTATCAGCTTACTAAGCCAGATGTGATCCTCCGGTTGGAGAAGGGAGAAGAGCCCTGG  
CTGGTGGAGAGAGAAATTCACCAAGAGACCCATCCTTAGCTGCAGAAGCTT

**B) SR-KRAB and AT-KRAB ATF luciferase reporter:**

**This segment was inserted NheI/XhoI into pGL3-ctrl (Promega).**

GCTAGCAGAGTGTGAGCACTGGGCAAAGTTGCCACCCTGGAGGGCGCGGAGGGACTGGTGGGC  
TGGGACGGGGAGGAGCCGGCCAAGAGGGCGGGATGGAATAGGAAAATACAGGTGAGGGGGAGGG  
TGTGTAAAGGGGAGCAGGAAAAGGAGGGTACAGAAGCAGGGGTCAAAGTGGGAGCTCCTAGG  
GTGGATGTGACAGCAGGACCTGCTGCACTGGGGGTTGGGAGTGTGATTCTCGAG

**C) SNF-KRAB ATF luciferase reporter:**

**This segment was inserted NheI/XhoI into pGL3-ctrl (Promega).**

**S1 site is underlined.**

GCTAGCTCCATTGCGTTGCAAATCACTCCTCAGAACCAAGCGTCTGGCATCTCCGGCTCCCTCT  
CCTCTCTGCGTAGTCTTGCCGCAATGGCTCAGGTTTGTGCGCGGCTCCCTACGCATGCGTCC  
CAGGCAATGGCTGCACATGCGCACATTTTTGCCGCAATGCAGGGGTCTCTGTCCCTCTGACCGG  
AATGTCTTGCAAAAGGCAGCTACCAAAAGGAATGCTTGAACATTCCTACTGCGGAAATTTGAG  
CGTGTATTAATAAAAAAAAAAATCACTGTCAATCTGGAATAATGGATATAAATTGCCTATTACTAA  
ATACATTTAATTTTTTAAAAAAAAATTGCTCCCAAGTGATTGCAAGCATCACACAGATTTTTATTA  
TGTGGGAGAGGAAAAAAGTTTTGATCTCCAATATGAGGAAGACTGGTTTCTAGGCTATATCATG  
TTACATAGTGTATCACACACACACACACACACACACACACACAAATCAAACATGAAGCCCA  
GCCAAATTGTCAGATACTTAAAAATCTGTACAGAAAAAAGTTATCCTGATTCCTAATTTCTAC  
ATTCTACATTAATGTAGTATTACTTGTATTTTCTTTCTCTGTGTTAGAACATATGACTGGGAGA  
AACTATTTCTCCAGATCATGGTGTGATTAAATTTTAATAGGAAGAACATTCAGTTATGAAAC  
TTATGTATCTGCTTCTTTTGTGTTGTTGGTTTTAGAGACAGGGCTTCCTAAATGTTGTTATGC  
CTGGGGGGTGAAGTAGACTATTTACTAACAATATATGACCTCATAGAAATGCCATCCAG  
TAATTCAGCTCTTAGGAAACTTATTCTAAGAAAGCAGTATTTTTGCATACTCAAGGCCAGGTT  
CAATTTGTAACAATATCTAAAAACAAAACAAAACATTTTGTAGATTGTGGATACATATATAA  
GAATTTATTTAGTTACTTTTGACCTATTAATTTCTCTGTCTGCCTACTCGAG

**D) Ube3a-VP64 ATF luciferase reporter:**

**This segment was inserted XhoI/HindIII into pGL3-ctrl (Promega), replacing the SV40 promoter.**

CTCGAGGTGGGTTCCAGGACAGCCAGGGCTTACAGAGAAATCTGTCTTGAAAAACCAATAATA  
AAAATATTTTTTATAGTGGGAGATCTTTCATATATATATGATGTGTATATATATACACACA  
CATACACACACATTTATAGGAGCTGTAATAAACAGAAAAGCACATTAATACATGTGATTGTTACA  
TTTTGAGCACTAGATGATTAAGGCTTACTAAGTTGCAAGCCAGGAAATAACATGTCAGCTAGTC  
TTTATAATAATTTAGTGTCAAATCATTAAACAACAACCTAAGTTAAACCCTCACTCCGGTACC

AACAAGTCACATGGCTCTAACAGGGTTCGGGTGTTCTGTAAATCAAAATTAGTCTCTATCCACG  
TGTGATCAAGCAAGGCGGTTTCTTCTCAGTTGACATCTACTGGAAGACAACACAGGAGGGGCTG  
GGCTTTTACCTACTAGTCTGGTAAGCCAGTGACATATCATGTTCTGGCAGAGGCTGATGGCCTT  
GTTTGCTGAAAGGTTGCCAATCTCAACGCCTGAATCCTTTACTCGGACAGTTCGGATGAAAAG  
TCGTAAGGGTCAGCTCTAGCAACAAAACGCTTCTATGCCTCCTCGTGCCGCCAGTAGGCTACAC  
CCTCTTGGCCTATTCGTCCCTCTGACTCCTGGGCTTTGCTAGGCTGGGTAGACCTGTCCGCTCT  
CGCGAGTACACCGAAGCACACTGGTCTATAGATTGAGTAAAAGGAGCAGAGGCTAAAAACACCA  
AGCCTCTCTCAGCCCAGTCTCAAGATGGCGACGATGCTGGCCAGCTTCCACCCAGCCCAAGGCC  
ATCTCCCCTTCCCAAAGGCCCTGCGCCGCAGGCGAAGGCGAGCTAGAGGAGGGCCCCACAGAG  
CTGCGATCGGGGCGGGGCAGAGCCCGTCGCCATCCACGCACGCGCAACCCCGCCTCGCATCCC  
GCCTCCGACTCCGAGCCCTCGCCCGGCAGGGTTGGCGCGCGCTGCAAGCTT

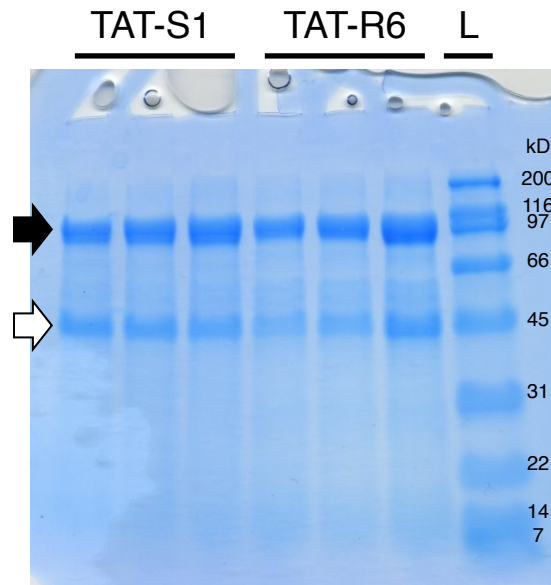

**Figure S2: TAT-ATFs protein purification.** Coomassie-stained gel demonstrating the purity of three separate preparations of TAT-S1 and TAT-R6 protein. Filled arrow, 100 kD full-length protein band is actually two close bands representing proteins with and without an attached MBP domain. Open arrow, 44 kD maltose binding protein.

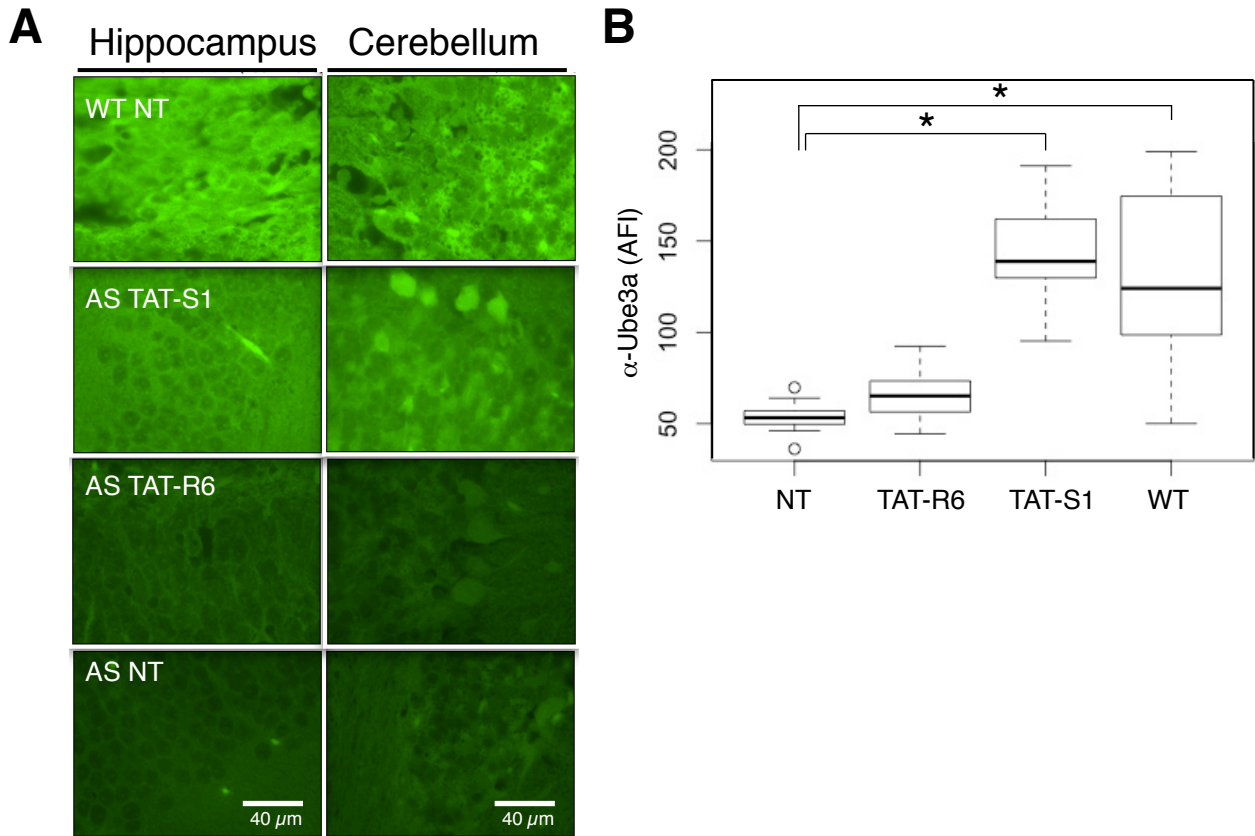

**Figure S3: High resolution images of Ube3a activation by TAT-S1 but not TAT-R6.** A mouse model of Angelman Syndrome (AS) was injected with TAT-S1 or TAT-R6 (160–200 mg/kg, intraperitoneal [IP]) three times per week for 7.5 weeks. **A)** High-resolution imaging of Ube3a protein expression in brain slices of the hippocampus hilus region of the dentate gyrus and the cerebellum Purkinje cell layer ( $\alpha$ -Ube3a [Atlas HPA039410], 5  $\mu$ m). Sections from no treatment (NT) wild type and AS mice are shown as controls. All images are unaltered, with no adjustment for autofluorescence. **B)** Quantification of Ube3a from unaltered images of the same regions in different mice. One-way ANOVA found significant difference between groups [ $F(3,22)=16.7$ ,  $p<0.0001$ ],  $n = 3-4$  mice. \*,  $p < 0.001$ , post-hoc Tukey-Kramer HSD; AFI, average fluorescence intensity.

**Table S1: DNA binding sequence (5' -> 3') and recognition helices (positions -1, 1, 2, 3, 4, 5, & 6 for fingers F6 -> F1) of the zinc finger arrays used in this study.**

| ZF Name              | F6      | F5      | F4      | F3      | F2      | F1      |
|----------------------|---------|---------|---------|---------|---------|---------|
| <b>A4</b>            | CCA     | GAC     | TAG     | TAG     | GTA     | AAA     |
| helices              | TSHSLTE | DPGNLVR | REDNLHT | REDNLHT | QSSSLVR | QRANLRA |
| <b>A6</b>            | GGC     | CAA     | GAG     | GGT     | GTA     | GCC     |
| helices              | DPGHLVR | QSGNLTE | RSDNLVR | TSGHLVR | QSSSLVR | DCRDLAR |
| <b>A7</b>            | ATA     | GAT     | TGA     | GTA     | AAA     | GGA     |
| helices              | QKSSLIA | TSGNLVR | QAGHLAS | QSSSLVR | QRANLRA | QRAHLER |
| <b>A8</b>            | GCC     | GCA     | GGC     | GAA     | GGC     | GAG     |
| helices              | DCRDLAR | QSGDLRR | DPGHLVR | QSSNLVR | DPGHLVR | RSDNLVR |
| <b>A9</b>            | AGG     | GCT     | CGG     | AGT     | CCG     | GAG     |
| helices              | RSDHLTN | TSGELVR | RSDKLTE | HRTTLTN | RNDTLTE | RSDNLVR |
| <b>AT56</b>          | GGT     | GAG     | GGG     | GAG     | GGT     | GTT     |
| helices              | TSGHLVR | RSDNLVR | RSDKLVR | RSDNLVR | TSGHLVR | TSGSLVR |
| <b>AT74</b>          | ATG     | GAA     | TAG     | GAA     | AAT     | ACA     |
| helices              | RRDELNV | QSSNLVR | REDNLHT | QSSNLVR | TTGNLTV | SPADLTR |
| <b>S1</b>            | CAT     | GCG     | TAG     | GGA     | GCC     | GCG     |
| helices              | TSGNLTE | RSDDLVR | REDNLHT | QRAHLER | DCRDLAR | RSDDLVR |
| <b>S2</b>            | GCA     | ATG     | GCT     | GCA     | CAT     | GCG     |
| helices              | QSGDLRR | RRDELNV | TSGELVR | QSGDLRR | TSGNLTE | RSDDLVR |
| <b>S3</b>            | GAT     | CTG     | GAG     | GAA     | ATA     | GTT     |
| helices              | TSGNLVR | RNDALTE | RSDNLVR | QSSNLVR | QKSSLIA | TSGSLVR |
| <b>SR71</b>          | GCA     | GGA     | CCT     | GCT     | GCA     | CTG     |
| helices              | QSGDLRR | QRAHLER | TKNSLTE | TSGELVR | QSGDLRR | RNDALTE |
| <b>SR115</b>         | CCT     | AGG     | GTG     | GAT     | GTG     | ACA     |
| helices              | TKNSLTE | RSDHLTN | RSDELVR | TSGNLVR | RSDELVR | SPADLTR |
| <b>R6 (neg ctrl)</b> | AAA     | GTT     | GCC     | CAC     | CCT     | GGA     |
| helices              | QRANLRA | TSGSLVR | DCRDLAR | SKKALTE | TKNSLTE | QRAHLER |

**Table S2: Primers used in this study**

| Name                                              | Sequence                                                                                                                                                  |
|---------------------------------------------------|-----------------------------------------------------------------------------------------------------------------------------------------------------------|
| <b>Primers for ChIP-PCR</b>                       |                                                                                                                                                           |
| Snurf-F                                           | 5'-CTCTCCTCTCTGCGCTAGTC-3'                                                                                                                                |
| Snurf-R                                           | 5'-AGAGACCCCTGCATTGCG-3'                                                                                                                                  |
| mmchr4-F                                          | 5'-GAGCTATGGCCCATTGATGT-3'                                                                                                                                |
| mmchr4-R                                          | 5'-AATAGTGGGATGGTGGGAGA-3'                                                                                                                                |
| <b>Sequencing primers for Luciferase plasmids</b> |                                                                                                                                                           |
| RVprimer3-f                                       | 5 ' CTAGCAAATAGGCTGTCC3 '                                                                                                                                 |
| GLprimer2-r                                       | 5 ' CTTTATGTTTTTGGCGTCTTCC3 '                                                                                                                             |
| <b>EMSA of purified ATFs</b>                      |                                                                                                                                                           |
| Biotinylated f<br>Primer r                        | /5Biosg/CCTCTTCGCTATTACGCCAGC<br>5 ' CACCCTGACTCGAGTACGATCGAACGTTT<br>5 ' -CCTCTTCGCTATTACGCCAGC CATGCGTAGGGAGCCGCG<br>GAACGTTTCGATCGTACTCGAGTCAGGGTG-3 ' |
| S1 target site                                    |                                                                                                                                                           |
| <b>AS mice genotyping primers</b>                 |                                                                                                                                                           |
| R1965                                             | 5 ' GCTCAAGGTTGTATGCCTTGGTGCT3 '                                                                                                                          |
| WTF1966                                           | 5 ' AGTTCTCAAGGTAAGCTGAGCTTGC3 '                                                                                                                          |
| ASF1967                                           | 5 ' TGCATCGCATTGTCTGAGTAGGTGTC3 '                                                                                                                         |
